# Supplementary material for: New insights on the supramolecular structure of highly porous core–shell drug nanocarriers using solid-state NMR spectroscopy
Source: Royal Society of Chemistry journal article supplement (doi:10.1039/c9ra07383c), 2019-01-01
Supplement: c9ra07383c1.pdf [file c9ra07383c1.pdf]

## **New insights on the supramolecular structure of highly porous core-shell drug nanocarriers using solid-state NMR spectroscopy.**

Marianna Porcino, Ioanna Christodoulou, Mai Vuong Dang Le, Ruxandra Gref and Charlotte Martineau-Corcus

### **Electronic Supplementary Information**

#### Experimental Section

Fig. S1. TEM images of nanoMIL-100(Al).

Fig. S2. TEM images of CD-P-coated nanoMIL-100(Al).

Fig. S3. TEM images of nanoMIL-100(Al) degraded 48 hours in PBS solution.

Fig. S4.  $^1\text{H}$  1D and  $^1\text{H}$ - $^1\text{H}$  2D MAS NMR spectra

Fig. S5.  $^{27}\text{Al}$  MAS and MQMAS NMR spectra

Table S1.  $^{27}\text{Al}$   $T_2$  values

Fig. S6.  $^{27}\text{Al}\{^1\text{H}\}$  MAS *D*-HMQC NMR spectra

Fig. S7.  $^{31}\text{P}$ - $^{31}\text{P}$  MAS DQ-SQ NMR spectrum of pure ATP

Fig. S8.  $^{31}\text{P}$  CPMAS NMR spectra

Fig. S9.  $^{31}\text{P}$ - $^{31}\text{P}$  MAS DQ-SQ NMR spectra of pure loaded or coated nanoMIL-100(Al)

## Experimental Section

### *Synthesis*

Al MIL(100) NPs were prepared and characterized as previously described.<sup>1</sup> The crystalline particles had a mean hydrodynamic diameter of  $160 \pm 15$  nm, BET surface area of  $1670 \pm 20$  m<sup>2</sup>/g. ATP was loaded according to previous organic solvent-free method reported in the case of other phosphorylated drugs.<sup>2-4</sup> Loadings reached 20 wt%.

### *Elemental analysis*

Elemental analysis was performed to quantify the C and H elemental weight contents in the MOF particles loaded or not with ATP after sample combustion at 1050°C using an Elemental Analyzer (Perkin-Elmer 2400 CHNS/O Series II System).

### *Transmission Electron Microscopy (TEM)*

Morphology and size of the solids were observed by Transmission Electron Microscopy (TEM), under a JEOL JEM-1400 microscope with acceleration voltage of 120 kV. Nanoparticle suspensions were deposited on copper grids, left to dry and observed without further staining.

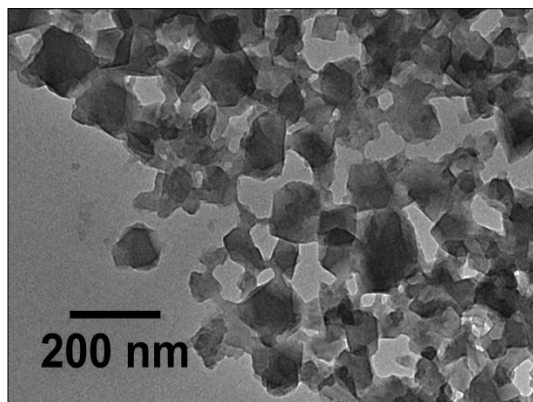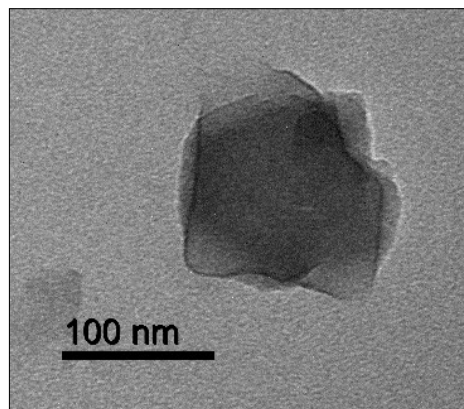

**Figure S1.** TEM images of nanoMIL-100(Al).

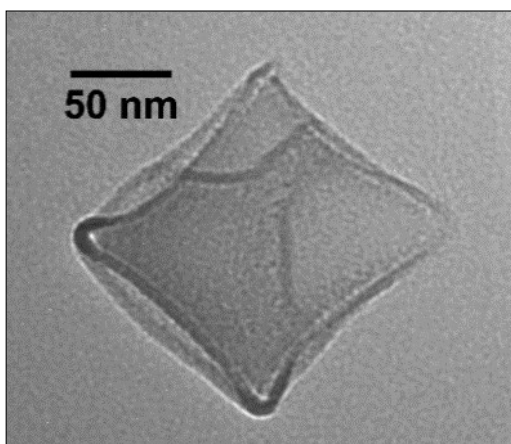

**Figure S2.** TEM images of CD-P coated nanoMIL-100(Al).

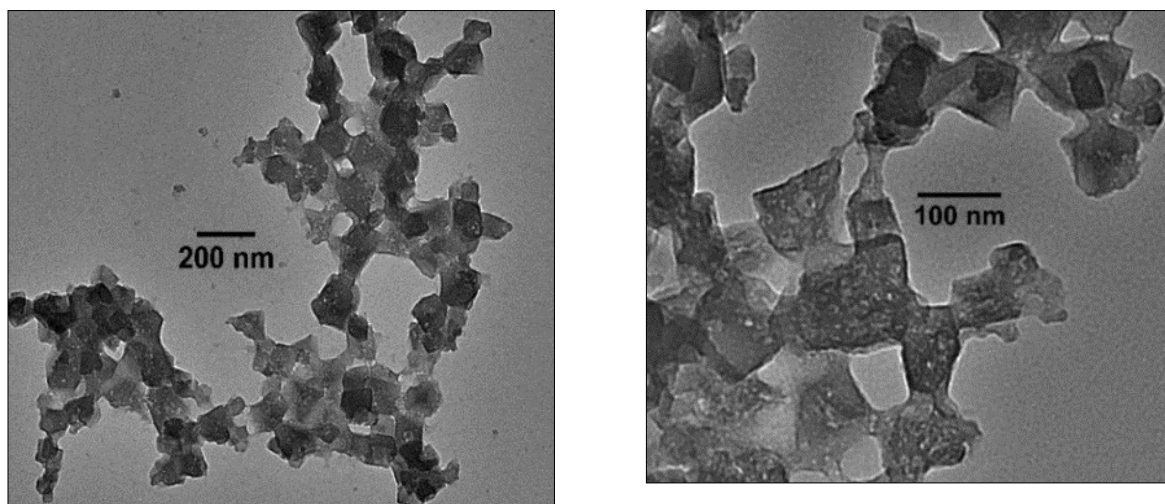

**Figure S3.** TEM images of nanoMIL-100(Al) degraded 48 hours in PBS solution.

All TEM images show no dissolution of the nanoparticles. Degradation in PBS occurs through the formation of holes in the NPs.

### ***Solid-state NMR Spectroscopy***

The  $^{27}\text{Al}$  MAS and MQMAS NMR spectra were recorded at 20 T using a H/X/Y 3.2 mm double-resonance probehead, spinning at 20 kHz MAS frequency. The z-filter MQMAS pulse sequence was used, with radiofrequency (RF) field for the excitation and reconversion of the triple-quantum coherence. The  $^{27}\text{Al}\{^{31}\text{P}\}$  D-HMQC NMR spectrum was recorded at 17.6 T using a 4 mm  $^1\text{H}$ - $^{31}\text{P}$ - $^{27}\text{Al}$  triple resonance probe spinning at 14 kHz MAS frequency. The symmetry-based R412 scheme<sup>5</sup> was used to recouple the Al-P dipolar interaction. The rotor-synchronized recoupling time was set to 1.7 ms.  $^{27}\text{Al}$  double-frequency sweep (DFS) was applied to boost the  $^{27}\text{Al}$

magnetization. Recycling delay was set to 0.25 s. 20  $t_1$  slices were recorded with 32432 (for the coated material) and 28800 (for the ATP-loaded ones) transients each, leading to a total of experimental time of about 45 hours. All spectra are treated with 200 Hz LB apodization in the F2 dimension. The  $^{27}\text{Al}$  and  $^{31}\text{P}$  chemical shifts are referenced to  $\text{Al}(\text{NO}_3)_3$  and  $\text{H}_3\text{PO}_4$  solution at 0 ppm, respectively. All spectra were analysed using the Dmfit software.<sup>6</sup>

The  $^1\text{H}$  MAS NMR spectra were recorded at a magnetic field of 20 T, using a Bruker 850 MHz WB NMR spectrometer and a HXY 1.3 mm probe in double mode. The spectra were acquired using a Hahn echo pulse sequence, with a  $90^\circ$  pulse duration of 3.5  $\mu\text{s}$ , an inter-pulse delay synchronized with one rotor period and a spinning rate of 60 kHz. The recycle delay was set to 5 s and 16 transients were recorded for each sample. The  $^1\text{H}$  chemical shifts were referenced to TMS at 0 ppm.

The  $^{27}\text{Al}$  MAS NMR spectra were recorded at the same magnetic field of the  $^1\text{H}$  spectra, using a HXY 3.2 mm probe in double mode, with a spinning rate of 20 kHz. The recycle delay was set to 0.3 s, the  $90^\circ$  pulse to 2.2  $\mu\text{s}$  with a RF field of 38 kHz. The  $^{27}\text{Al}$  chemical shifts are referenced to  $\text{Al}(\text{NO}_3)_3$  solution at 0 ppm.

The  $^{27}\text{Al}\{^1\text{H}\}$  *D*-HMQC (dipolar-Heteronuclear multi-quantum correlation) 2D experiment is performed under a MAS frequency of 60 kHz in a 1.3 mm probe using the same spectrometer mentioned before.  $\text{R}4^2_1$  was used as the recoupling sequence in order to reintroduce  $^1\text{H}$ - $^{27}\text{Al}$  heteronuclear dipolar interactions, with 1.4 ms of recoupling time. 80  $t_1$  slices with 1024 transients were co-added. The States-TPPI procedure provides a phase sensitive 2D NMR spectrum.

The  $^{27}\text{Al}$  MQMAS (Multi-Quantum Magic-Angle Spinning) was carried out at 9.4 T (Larmor Frequency of 104 MHz), using a HXY 2.5 mm probe in double mode with a spinning rate of 25 kHz, using a triple-quantum z-filtered pulse sequence and is shown after a shearing transformation.

The  $^{31}\text{P}$  cross-polarization experiments were recorded on a 9.4 T magnet ( $^1\text{H}$  and  $^{31}\text{P}$  Larmor frequency of 400 and 160 MHz, respectively) with a Bruker spectrometer, using a 4 mm double resonance probe and spinning at 14 kHz MAS frequency. The  $^{31}\text{P}$  chemical shifts are referenced to  $\text{H}_3\text{PO}_4$  solution at 0 ppm. Recycling delay was set to 5 s, the initial  $90^\circ$  pulse on  $^1\text{H}$  to 4  $\mu\text{s}$  with a RF field of 62 kHz and the contact time was set to 5 ms.  $^1\text{H}$  SPINAL-64 decoupling was applied during the  $^{31}\text{P}$  acquisition.

The  $^{31}\text{P}$ - $^{31}\text{P}$  DQ-SQ MAS spectra were recorded on the same 9.4 T spectrometer, using the same probe and the same spinning speed as mentioned before. The INADEQUATE pulse sequence was used with a recoupling delay of 7 ms, for a total experimental time of 4 hours.  $^1\text{H}$  SPINAL-64 decoupling was applied

during recoupling time and acquisition with RF fields of 70 kHz and 79 kHz respectively. The  $S_3$  pulse sequence was used with a recoupling delay of 2.8 ms.  $^1\text{H}$  CW (RF field of 52 kHz) and SPINAL-64 (RF field of 70 kHz) decoupling were applied during recoupling time and acquisition respectively. Using a recycling delay of 4 s, 60  $t_1$  slices with 192-960 transients were co-added, leading to a total of experimental times of 16-64 hours. For both INADEQUATE and  $S_3$ , the sensitivity was boosted by an initial  $^1\text{H} \rightarrow ^{31}\text{P}$  CP block.

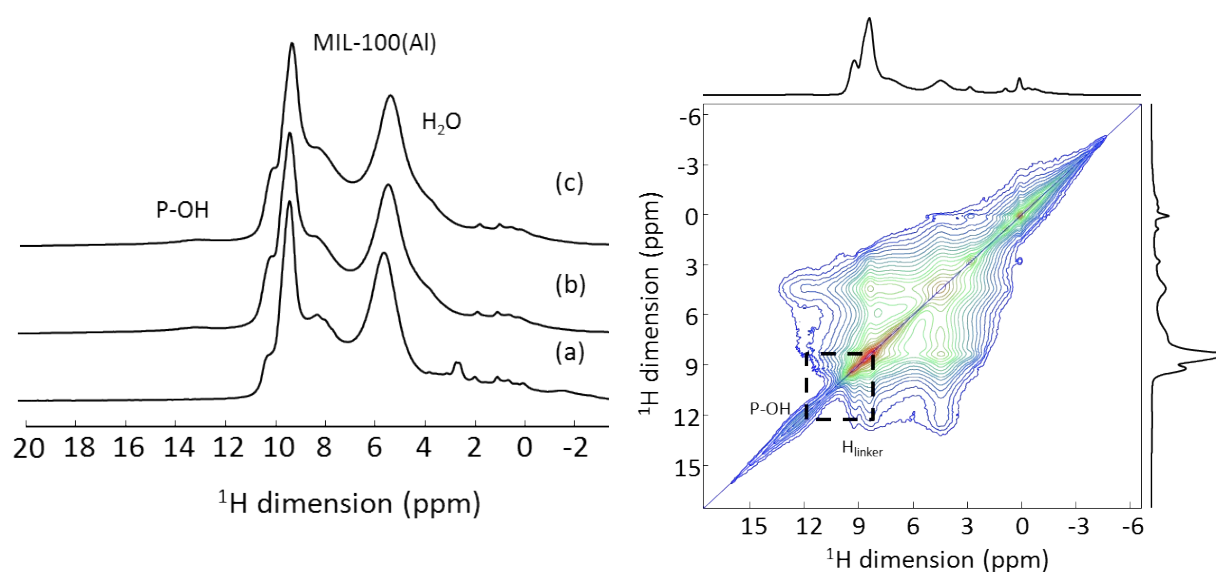

**Figure S4.** Left:  $^1\text{H}$  MAS NMR spectra of (a) nanoMIL-100(Al), (b) ATP-loaded nanoMIL-100(Al) and (c) CD-P coated ATP-loaded nanoMIL-100(Al). Right: 2D  $^1\text{H}$ - $^1\text{H}$  spin diffusion NMR spectrum of CD-P coated ATP-loaded nanoMIL-100(Al). The dash lines indicate the spatial proximity between a phosphate proton and a proton from the linker of the MOF.

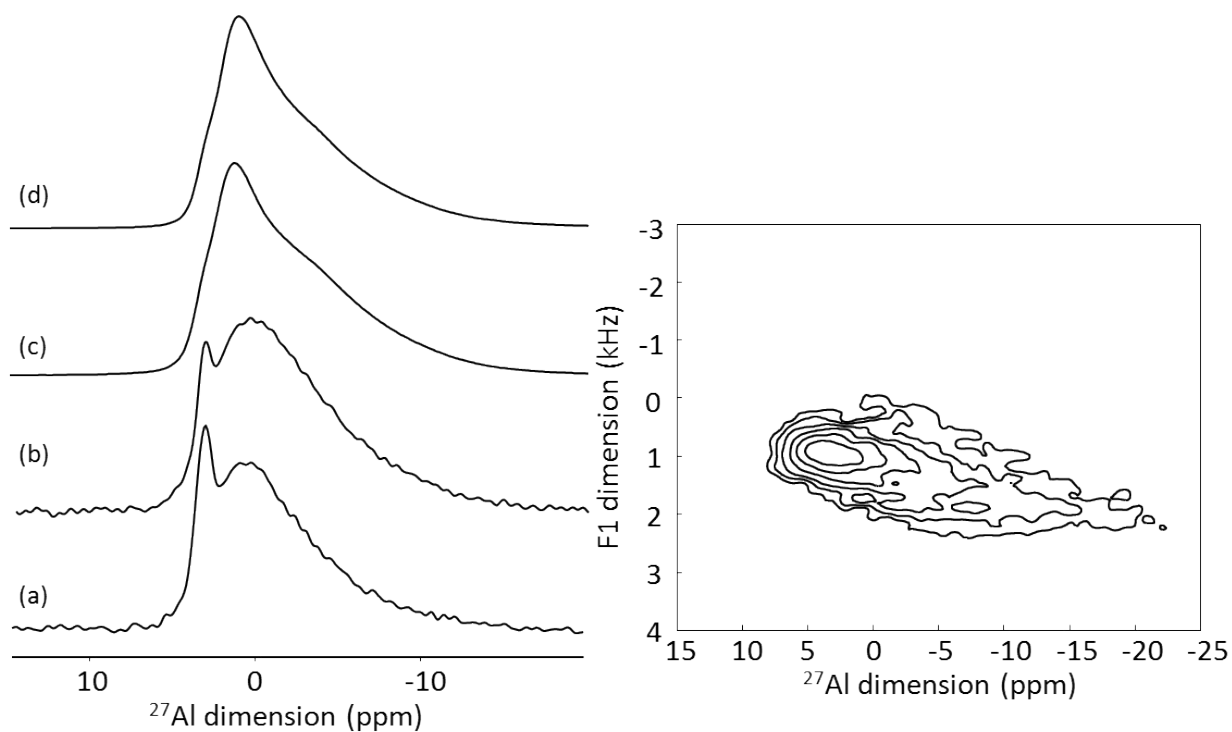

**Figure S5.** Left:  $^{27}\text{Al}$  MAS NMR spectra of (a) nanoMIL-100(Al), (b) CD-P coated nanoMIL-100(Al), (c) ATP-loaded nanoMIL-100(Al) and (d) CD-P coated ATP-loaded nanoMIL-100(Al) recorded at 20.0 T. Right:  $^{27}\text{Al}$  MQMAS NMR spectrum of nanoMIL-100(Al) recorded at 9.4 T.

The  $^{27}\text{Al}$  MQMAS NMR spectrum of nanosized MIL-100(Al) is similar to the one previously reported in the literature for micro sized MIL-100(Al)<sup>7</sup> and display resonances in the chemical shift range of the six-coordinated aluminum atom (0 to - 10 ppm).

| Sample                        | $^{27}\text{Al}$ $T_2$ (ms, $\pm 0.1$ ) |
|-------------------------------|-----------------------------------------|
| MIL100(Al)                    | 3.8                                     |
| MIL100(Al)@ATP                | 3.4                                     |
| CD-P coated MIL100(Al)        | 3.8                                     |
| CD-P coated<br>MIL100(Al)@ATP | 3.5                                     |

**Table S1.**  $^{27}\text{Al}$   $T_2$  measured from a spin echo experiment of the samples studied.

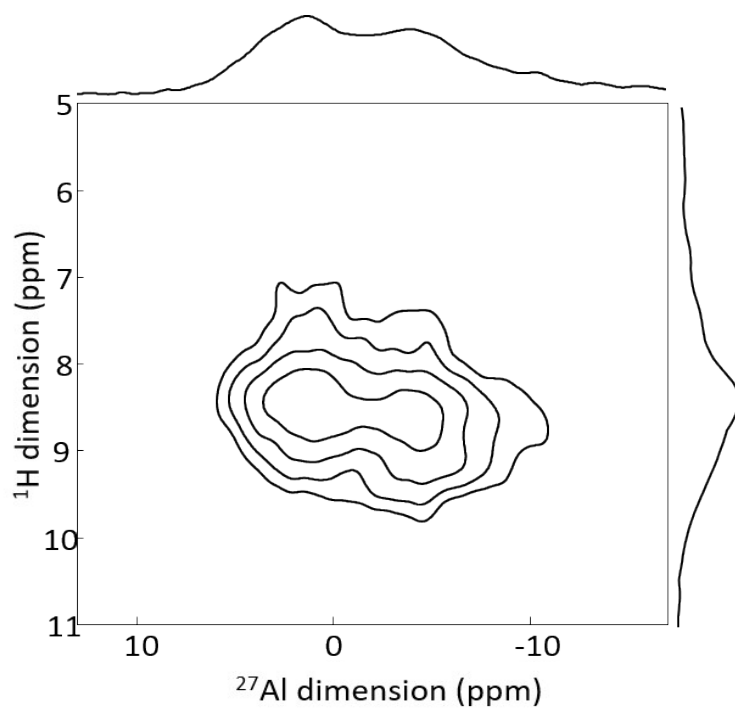

**Figure S6.**  $^{27}\text{Al}\{^1\text{H}\}$  MAS  $D$ -HMQC NMR spectrum of CD-P coated MIL-100(Al). Only a correlation between the  $^{27}\text{Al}$  signal and the protons of the linkers is observed.

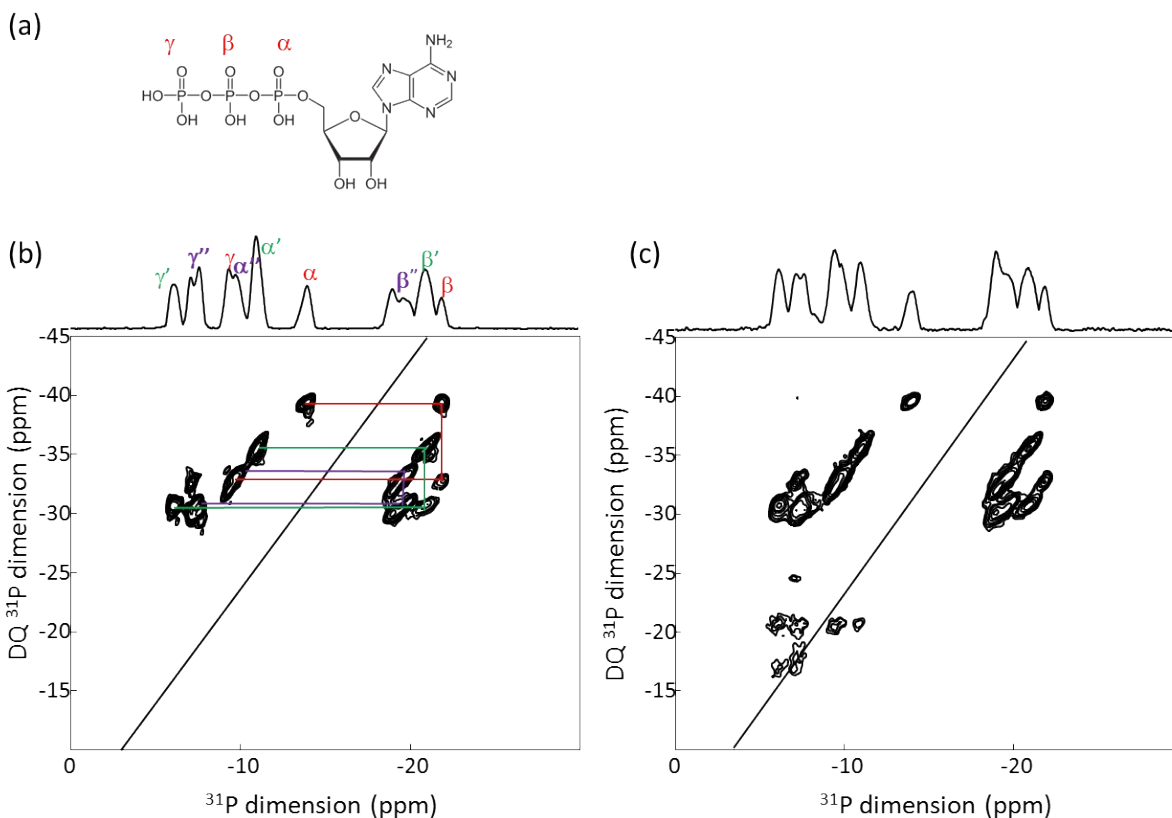

**Figure S7.**  $^{31}\text{P}$ - $^{31}\text{P}$  MAS DQ-SQ NMR spectrum of ATP recorded at 9.7 T with CP-INADEQUATE (left) and  $S_3$  (right) pulse sequence. The lines represent the different hydrated forms of ATP present in the commercial product. Additional peaks are seen on the  $S_3$  NMR spectrum (dipolar-based), which are due to longer range interactions.

In the 2D  $^{31}\text{P}$ - $^{31}\text{P}$  homonuclear correlation experiments ( $J$ -type and through space-proximity), the  $\beta$ -phosphorus atom (the middle of the tri-phosphate) is identified as it is the only one having correlation with two other P atoms. The commercial ATP is a mixture of several phases that differ by their hydration states. Additionally, the through-space correlation experiment (right part of Figure S4) gives the opportunity to observe the inter-molecular interactions.



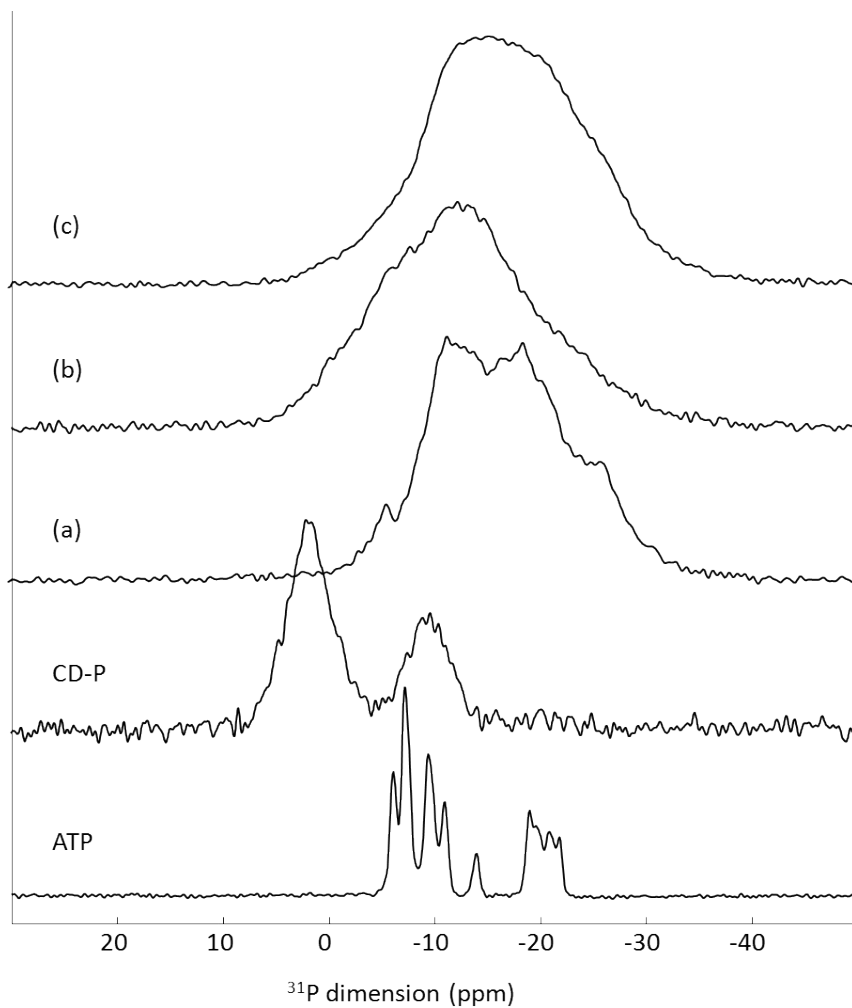

**Figure S8.**  $^{31}\text{P}$  CPMAS NMR spectra of pure ATP, CD-P, (a) ATP loaded nanoMIL-100(AI), (b) CD-P coated nanoMIL-100 and (c) CD-P coated ATP loaded nanoMIL-100.

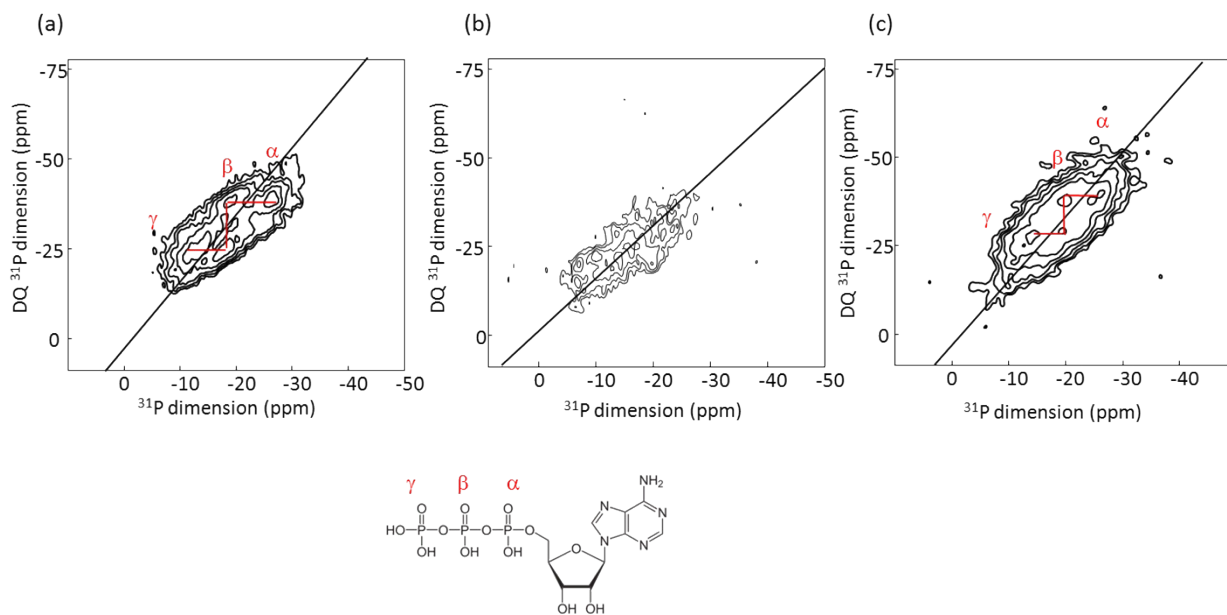

**Figure S9.**  $^{31}\text{P}$ - $^{31}\text{P}$  DQ-SQ MAS NMR spectra of (a) ATP loaded nanoMIL-100(Al), (b) CD-P coated nanoMIL-100 and (c) CD-P coated ATP loaded nanoMIL-100. Below is shown the ATP molecule with the triphosphate groups labeled.

Similar to the experiment performed on the pure ATP, the middle  $\beta$ -phosphate is identified as it is linked to two other phosphorus atoms. The triphosphate structure is preserved once the ATP is loaded in the pores of the nanoMOF. The  $^{31}\text{P}$  resonance at *ca*  $-15$  ppm shows correlation with the aluminum atoms in the  $^{27}\text{Al}$ - $^{31}\text{P}$  *D*-HMQC NMR spectrum (see main text). It therefore corresponds to the terminal phosphate group.

## References

1. V. Agostoni, P. Horcajada, M. Noiray, M. Malanga, A. Aykac, L. Jicsinszky, A. Vargas-Berenguel, N. Semiramoth, S. Daoud-Mahammed, V. Nicolas, C. Martineau, F. Taulelle, J. Vigneron, A. Etcheberry, C. Serre, R. Gref, *Sci. Reports* 2015, **5**, 7925.
2. V. Rodriguez-Ruiz, A. Maksimenko, R. Anand, S. Monti, V. Agostoni, P. Couvreur, M. Lampropoulou, K. Yannakopoulou, R. Gref, *J. Drug Target.*, 2015, **23**, 759.
3. V. Agostoni, R. Anand, S. Monti, S. Hall, G. Maurin, P. Horcajada, C. Serre, K. Bouchemal, R. Gref, *J. Mater. Chem. B*, 2013, **1**, 4231.

4. V. Agostoni, T. Chalati, P. Horcajada, H. Willaime, R. Anand, N. Semiramo, T. Baati, S. Hall, G. Maurin, H. Chacun, K. Bouchemal, C. Martineau, F. Taulelle, P. Couvreur, C. Rogez-Kreuz, P. Clayette, S. Monti, C. Serre, R. Gref, *Adv. Healthcare Mater.*, 2013, **2**, 1630.
5. A. Brinkmann, A.P.M. Kentgens *J. Am. Chem. Soc.*, 2006, **128**, 14758.
6. D. Massiot, F. Fayon, M. Capron, I. King, S. Le Calvé, B. Alonso, J. O. Durand, B. Bujoli, Z. Gan, G. Hoatson, *Magn. Reson. Chem.*, 2002, **40**, 70.
7. M. Haouas, C. Volkringer, T. Loiseau, G. Ferey, F. Taulelle, *J. Phys. Chem. C*, 2011, **115**, 17934.
